# Supplementary material
Source: Springer Nature journal article supplement (https://www.springermedizin.de/resource/supplementary/12985_2010_918_MOESM9_ESM.pdf/9608738)

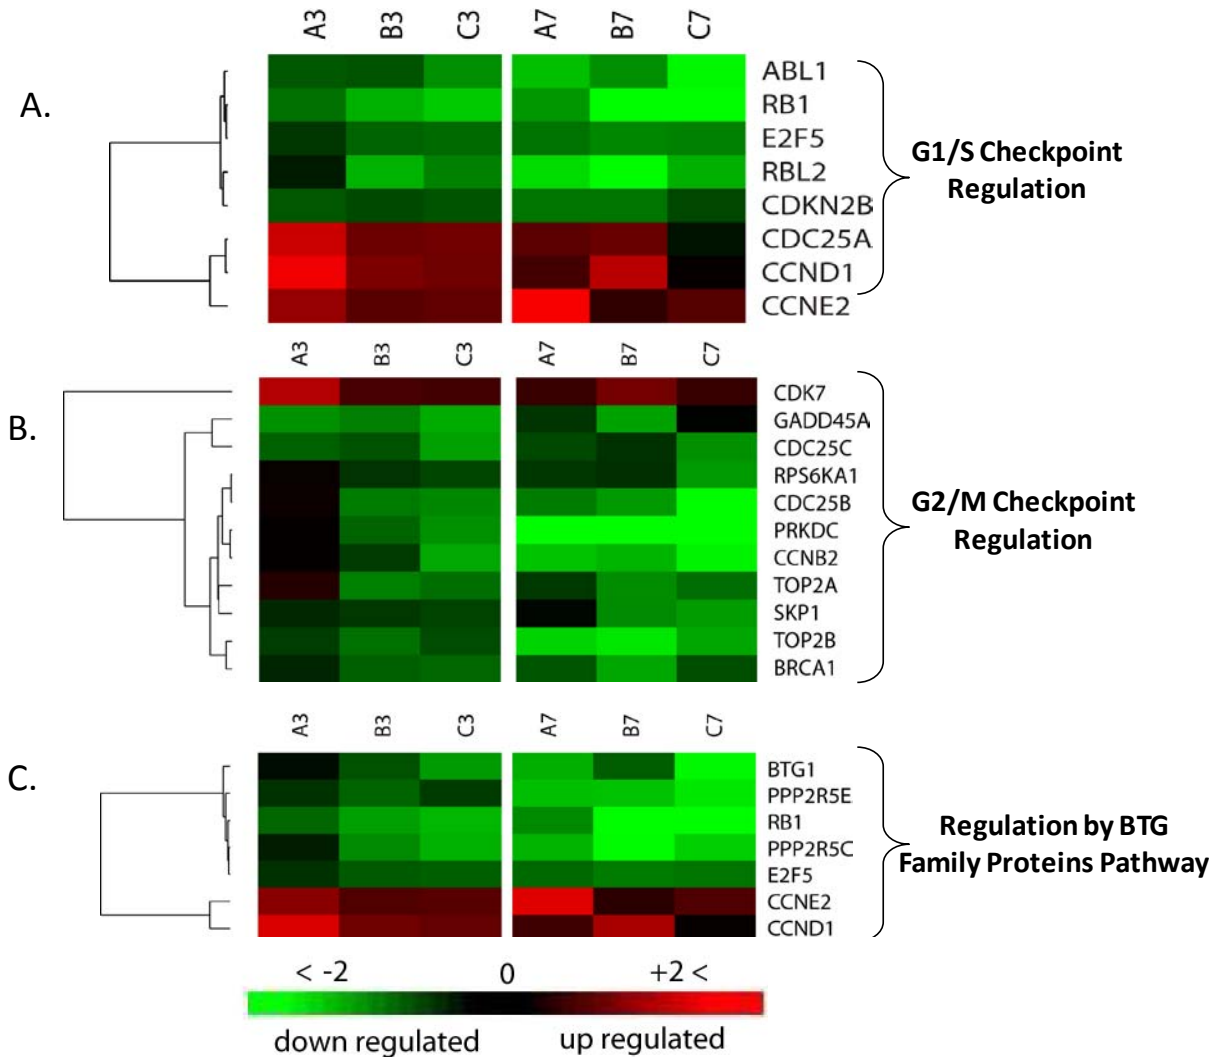

Supplement: MOESM9 [file 9608738]
